# Supplementary material
Source: Springer Nature journal article supplement (https://www.springermedizin.de/resource/supplementary/13033_2013_179_MOESM2_ESM.pdf/9651998)
Supplement: MOESM2 [file 9651998]

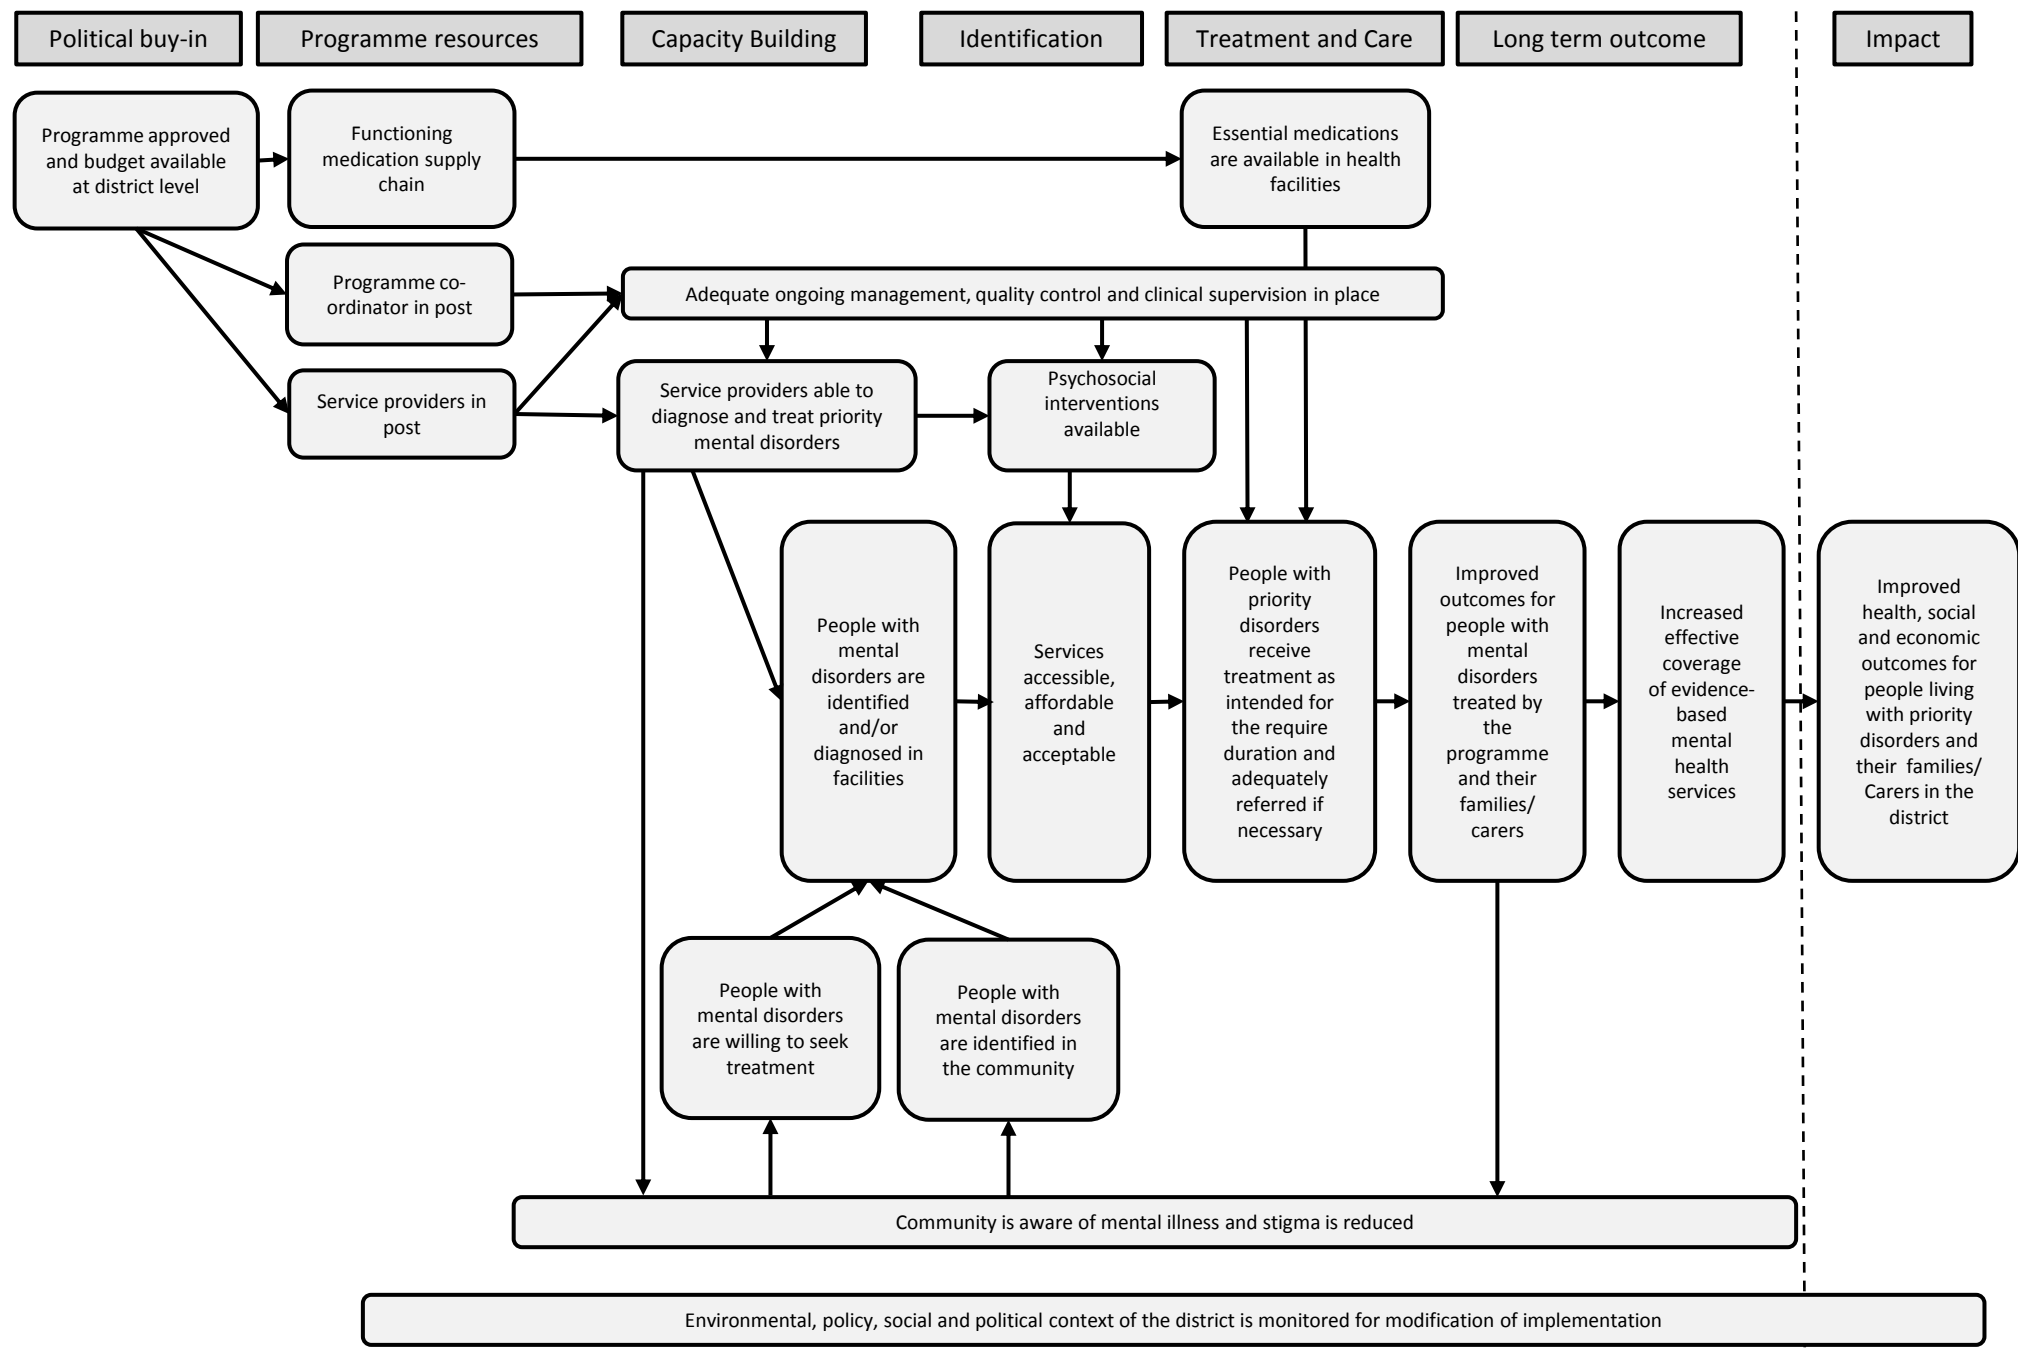

Political buy-in

Programme resources

Capacity Building

Identification

Treatment and Care

Long term outcome

Impact

Programme approved and budget available at district level

Functioning medication supply chain

Programme co-ordinator in post

Service providers in post

Adequate ongoing management, quality control and clinical supervision in place

Service providers able to diagnose and treat priority mental disorders

Psychosocial interventions available

Essential medications are available in health facilities

People with mental disorders are identified and/or diagnosed in facilities

Services accessible, affordable and acceptable

People with priority disorders receive treatment as intended for the require duration and adequately referred if necessary

Improved outcomes for people with mental disorders treated by the programme and their families/ carers

Increased effective coverage of evidence-based mental health services

Improved health, social and economic outcomes for people living with priority disorders and their families/ Carers in the district

People with mental disorders are willing to seek treatment

People with mental disorders are identified in the community

Community is aware of mental illness and stigma is reduced

Environmental, policy, social and political context of the district is monitored for modification of implementation
